# Supplementary material
Source: PubMed Central journal article supplement (PMC4867227)
Supplement: NIHMS783288-supplement-Supplementary_materials.pdf [file NIHMS783288-supplement-Supplementary_materials.pdf]

# Supplementary materials for “A graphical model method for integrating multiple sources of genome-scale data”

Daniel Dvorkin\*, Brian Biehs, Katerina Kechris

June 27, 2013

## Supplementary Appendices

|                                         |           |
|-----------------------------------------|-----------|
| <b>A Initialization and termination</b> | <b>2</b>  |
| <b>B The joint model E-step</b>         | <b>2</b>  |
| <b>References</b>                       | <b>21</b> |

## Supplementary Figures

|                                                                                  |   |
|----------------------------------------------------------------------------------|---|
| 1 Nonparametric density estimates for all $C_i$ and $D_I$ data sources . . . . . | 4 |
|----------------------------------------------------------------------------------|---|

## Supplementary Tables

|                                                                                    |    |
|------------------------------------------------------------------------------------|----|
| 1 Marginal data simulation parameters. . . . .                                     | 5  |
| 2 Results for joint model fits to simulated data . . . . .                         | 5  |
| 3 Marginal model selection results . . . . .                                       | 6  |
| 4 Joint model selection results . . . . .                                          | 6  |
| 5 Parameters for PVII data . . . . .                                               | 6  |
| 6 Parameters for normal data . . . . .                                             | 7  |
| 7 Posterior probability for top 200 genes . . . . .                                | 8  |
| 8 Model ranks for all KEGG Hedgehog pathway genes, for $C_i$ data set. . . . .     | 8  |
| 9 GO BP terms from top 200 genes from $C_i$ joint model . . . . .                  | 9  |
| 10 GO BP terms from top 200 genes from $C_i$ binding marginal model . . . . .      | 10 |
| 11 GO BP terms from top 200 genes from $C_i$ expression marginal model . . . . .   | 11 |
| 12 GO BP terms from top 200 genes from $C_i$ conservation marginal model . . . . . | 12 |
| 13 GO BP terms from $fdr$ -selected genes from $C_i$ joint model . . . . .         | 13 |
| 14 KEGG pathways from selected genes from $C_i$ gene lists. . . . .                | 14 |
| 15 GO BP terms from top 200 genes from $D_I$ joint model . . . . .                 | 15 |
| 16 GO BP terms from top 200 genes from $D_I$ binding marginal model . . . . .      | 16 |
| 17 GO BP terms from top 200 genes from $D_I$ expression marginal model . . . . .   | 17 |
| 18 GO BP terms from top 200 genes from $D_I$ conservation marginal model . . . . . | 18 |
| 19 GO BP terms from $fdr$ -selected genes from $D_I$ joint model . . . . .         | 19 |
| 20 KEGG pathways from selected genes from $D_I$ gene lists. . . . .                | 20 |

---

\*corresponding author: daniel.dvorkin@gmail.com

## A Initialization and termination

We use a “data-driven” method to initialize the marginal models. The starting means for the components are chosen from the quantiles of the data; specifically, the  $y$ th mean is the  $\{(K - y + 1) - 0.5\}/K$ th quantile. For example, when  $K = 2$ , the starting means are the 0.75th and 0.25th quantiles, while when  $K = 3$ , the starting means are approximately the 0.833th, 0.5th, and 0.167th quantiles. Implicitly, we are assuming that  $p_1 = \dots = p_K = 1/K$ , ordering the components by  $\mu_1 > \dots > \mu_K$ , and choosing the median of each component for the starting mean, justified by the fact that both the normal and PVII distributions are symmetrical. In the multivariate case, this procedure is applied to each column of the data. We then calculate the  $N \times K$  similarity matrix  $\mathbf{S}$  as the inverse of Manhattan distances from each sample to each starting mean, and initialize the weight matrix by dividing the similarities for each sample by the sum of its similarities:

$$\begin{aligned} s_{n,y} &= 1 / \left( \epsilon + \sum_d |x_{n,d} - \mu_{y,d}| \right), \\ w_{n,y} &= s_{n,y} / \sum_k s_{n,k} \end{aligned} \quad (\text{S1})$$

where  $\epsilon$  is a very small number, here the R standard of approximately  $1.49 \times 10^{-8}$ . The initial  $\mathbf{W}$  is then used as input for the first M-step of the algorithm. This method has proven very stable for a wide variety of real and simulated data, and for the current data sets appears to perform at least as well as (and often better than) the use of multiple random restarts for initialization, with much lower computational cost.

For the joint models, we fit marginal models to each data source and use the posterior probability matrices from these fits for the initial  $\mathbf{W}_1, \dots, \mathbf{W}_Z$ . In the layered model, we also fit marginal models with  $K = K_0$  to each data source to obtain matrices we may call  $\mathbf{W}_z^{K_0}$  (observe that  $\mathbf{W}_z^{K_0} = \mathbf{W}_z$  when  $K_0 = K_z$ ) and average these matrices to obtain our initial  $\mathbf{U} = \frac{1}{Z} \sum_z \mathbf{W}_z^{K_0}$ . In the chained model,  $\mathbf{U} = \mathbf{W}_1^{K_0}$ . Finally, we calculate the initial transition matrices  $\mathbf{Q}_z$  as the non-negative least-squares solutions (Mullen and van Stokkum, 2012) to  $\mathbf{U}\mathbf{Q}_1 = \mathbf{W}_1$  for both the layered and chained models,  $\mathbf{U}\mathbf{Q}_z = \mathbf{W}_z$  for layered, and  $\mathbf{W}_{z-1}\mathbf{Q}_z = \mathbf{W}_z$  for chained. With these we can calculate the initial  $\mathbf{V}_z$ 's and proceed with the first M-step.

In both marginal and joint models, we set the maximum number of iterations to 1000. We calculate the log-likelihood  $\mathcal{L}(\theta^{(i)})$  at each iteration, and terminate when the maximum number of iterations is reached or when changes in log-likelihood between iterations become sufficiently small:  $|\{\mathcal{L}(\theta^{(i)})/\mathcal{L}(\theta^{(i-1)})\} - 1| \leq 10^{-6}$ . This criterion usually leads to termination after 100-300 iterations.

## B The joint model E-step

For compactness in the discussion of the E-step, let all parameter notation refer to the previous iteration's parameter estimates. For example,  $p_{z,y_z} = f(y_z|\theta) = \Pr(\mathcal{Y}_z = y_z|\theta^{(i-1)})$ , with parameters  $\theta = \theta^{(i-1)}$ . We will also write density functions without explicit reference to the parameters, such as  $g_{z,n,y_z} = f_{y_z}(\mathbf{x}_{z,n})$  rather than  $g_{z,n,y_z} = f_{y_z}(\mathbf{x}_{z,n}|\theta)$ .

Let  $\alpha_{0,n,y_0} = p_{0,y_0}$  for all  $n = 1, \dots, N$ . For the layered model, we also define the intermediate terms

$$\begin{aligned} g'_{z,n,y_0} &= f(\mathbf{x}_{z,n}|y_0) = \sum_{k_z} g_{z,n,k_z} q_{y_0,k_z}, \\ g^*_{n,y_0} &= f(\mathbf{x}_{\cdot,n}|y_0) = \prod_z g'_{z,n,y_0}, \\ \beta_{0,n,y_0} &= f(\mathbf{x}_{\cdot,n}, y_0) = g^*_{n,y_0} \alpha_{0,n,y_0}, \\ \gamma_n &= f(\mathbf{x}_{\cdot,n}) = \sum_{k_0} \beta_{0,n,k_0}. \end{aligned} \quad (\text{S2})$$

Then the posterior probabilities are calculated as

$$\begin{aligned} u_{n,y_0} &= \beta_{0,n,y_0} / \gamma_n, \\ v_{z,y_0,n,y_z} &= u_{n,y_0} g_{z,n,y_z} q_{z,y_0,y_z} / g'_{z,n,y_0}, \\ w_{z,n,y_z} &= \sum_{k_0} v_{z,k_0,n,y_z}. \end{aligned} \quad (\text{S3})$$

What may seem excessive formalism in the terms defined above is to facilitate efficient matrix computation. Let  $\mathbf{G}_z$  be the  $N \times K_z$  matrix of which the  $(n, y_z)$ th element is  $g_{z,n,y_z}$ , and similarly define the matrices  $\alpha_0$ ,  $\mathbf{G}'_z$ ,  $\mathbf{G}^*$ , and  $\beta_0$ , and the vector  $\gamma$ . Also let  $\mathbf{Q}_z$  be the  $K_0 \times K_z$  matrix of which the  $(y_0, y_z)$ th element is  $q_{z,y_0,y_z} = f(y_z|y_0)$ .

Now for a vector  $\mathbf{a}$  of length  $J$ , and matrices  $\mathbf{B}$  and  $\mathbf{C}$  of dimension  $J \times K$ , let “ $\circ$ ” denote the Hadamard (element-wise) product of the matrices, that is,  $\mathbf{B} \circ \mathbf{C}$  is the  $J \times K$  matrix such that  $(\mathbf{B} \circ \mathbf{C})_{j,k} = b_{j,k} c_{j,k}$ . Define the row-wise vector-matrix product as  $(\mathbf{a} \circ \mathbf{B})_{j,k} = a_j b_{j,k}$ , and similarly define row-wise division as  $(\mathbf{B}/\mathbf{a})_{j,k} = b_{j,k}/a_j$ . Finally,

define row-wise matrix summation so that  $\sum_k(\mathbf{B})$  is the  $J$ -length vector of which the  $j$ th element is  $\sum_k b_{jk}$ . Then Equations (S2) and (S3) become

$$\begin{aligned}
\mathbf{G}'_z &= \mathbf{G}_z \mathbf{Q}_z^T, \\
\mathbf{G}^* &= \prod_z \mathbf{G}'_z, \\
\boldsymbol{\beta}_0 &= \boldsymbol{\alpha}_0 \circ \mathbf{G}^*, \\
\boldsymbol{\gamma} &= \sum_{k_0}(\boldsymbol{\beta}_0), \\
\mathbf{U} &= \boldsymbol{\beta}_0 / \boldsymbol{\gamma}, \\
\mathbf{V}_{z,y_0} &= \mathbf{u}_{\cdot,y_0} \circ (\mathbf{q}_{z,y_0,\cdot} \circ \mathbf{G}_z^T)^T / \mathbf{g}'_{z,\cdot,y_0}, \\
\mathbf{W}_z &= \sum_{k_0} \mathbf{V}_{z,k_0}
\end{aligned} \tag{S4}$$

where  $\mathbf{B}^T$  denotes the transpose of  $\mathbf{B}$ . Note that in the final line of Equation (S4), the operation is not row-wise matrix summation, but summation over a list of matrices; that is,  $\mathbf{W}_z = \mathbf{V}_{z,1} + \dots + \mathbf{V}_{z,K_0}$  where each  $\mathbf{V}_{z,k_0}$  is an  $N \times K_z$  matrix.

For the chained model, let  $\mathbf{x}_{z-,n} = (\mathbf{x}_{1,n}, \dots, \mathbf{x}_{z,n})$ , and similarly  $\mathbf{x}_{z+,n} = (\mathbf{x}_{z,n}, \dots, \mathbf{x}_{Z,n})$ . Also let  $r_{z,y_z,y_{z-1}} = f(y_{z-1}|y_z) = p_{z-1,y_{z-1}} q_{z,y_{z-1},y_z} / p_{z,y_z}$ , where  $q_{z,y_{z-1},y_z} = f(y_z|y_{z-1})$ . Then the intermediate terms are

$$\begin{aligned}
\alpha_{z,n,y_z} &= f(\mathbf{x}_{z-,n}, y_z) = \sum_{k_{z-1}} \alpha_{z-1,n,k_{z-1}} q_{z,k_{z-1},y_z} g_{z,n,y_z}, \\
\beta_{Z,n,y_Z} &= f(\mathbf{x}_{Z,n}, y_Z) = p_{Z,y_Z} g_{Z,n,y_Z}, \\
\beta_{z,n,y_z} &= f(\mathbf{x}_{z+,n}, y_z) = \sum_{k_{z+1}} \beta_{z+1,n,k_{z+1}} r_{z+1,k_{z+1},y_z} g_{z,n,y_z} \text{ for } z < Z, \\
\beta_{0,n,y_0} &= f(\mathbf{x}_{\cdot,n}, y_0) = \sum_{k_1} \beta_{1,n,k_1} r_{1,k_1,y_0}
\end{aligned} \tag{S5}$$

while  $\gamma_n$  is as in Equation (S2). Then  $u_{n,y_0}$  is as in Equation (S3), and the other posterior probabilities are

$$\begin{aligned}
v_{z,y_{z-1},n,y_z} &= \alpha_{z-1,n,y_{z-1}} \beta_{z,n,y_z} q_{z,y_{z-1},y_z} / (p_{z,y_z} \gamma_n), \\
w_{z,n,y_z} &= \sum_{k_{z-1}} v_{z,k_{z-1},n,y_z}.
\end{aligned} \tag{S6}$$

In matrix form,  $\mathbf{R}_z = (\mathbf{p}_{z-1} \circ \mathbf{Q}_z)^T / \mathbf{p}_z$ , and Equations (S5) and (S6) become

$$\begin{aligned}
\boldsymbol{\alpha}_z &= (\boldsymbol{\alpha}_{z-1} \mathbf{Q}_z) \circ \mathbf{G}_z, \\
\boldsymbol{\beta}_Z &= (\mathbf{p}_Z \circ \mathbf{G}_Z^T)^T, \\
\boldsymbol{\beta}_z &= (\boldsymbol{\beta}_{z+1} \mathbf{R}_{z+1}) \circ \mathbf{G}_z \text{ for } z < Z, \\
\boldsymbol{\beta}_0 &= \boldsymbol{\beta}_1 \mathbf{R}_1, \\
\mathbf{V}_{z,y_{z-1}} &= \{(\boldsymbol{\alpha}_{z-1,\cdot,y_{z-1}} \circ \boldsymbol{\beta}_z)^T \circ \mathbf{q}_{z,y_{z-1},\cdot} / \mathbf{p}_z\}^T / \boldsymbol{\gamma}, \\
\mathbf{W}_z &= \sum_{k_{z-1}} \mathbf{V}_{z,k_{z-1}}
\end{aligned} \tag{S7}$$

with  $\boldsymbol{\gamma}$  and  $\mathbf{U}$  as in Equation (S4).

The calculations in the chained model are almost the same as those in the Baum-Welch algorithm (Baum et al., 1970; McLachlan and Krishnan, 2008, pp. 290-293) for hidden Markov models, but the goal differs: because here the  $\mathcal{Y}_z$ 's are heterogeneous, we wish to estimate the individual transition matrices  $\mathbf{Q}_1, \dots, \mathbf{Q}_Z$  rather than a single transition matrix for the entire model. In the special case of  $K_0 = K_1 = \dots = K_Z$ , the Baum-Welch estimator for the transition matrix in the standard hidden Markov model can be seen as an average of the estimators for the  $\mathbf{Q}_z$ 's in the M-step of our method.

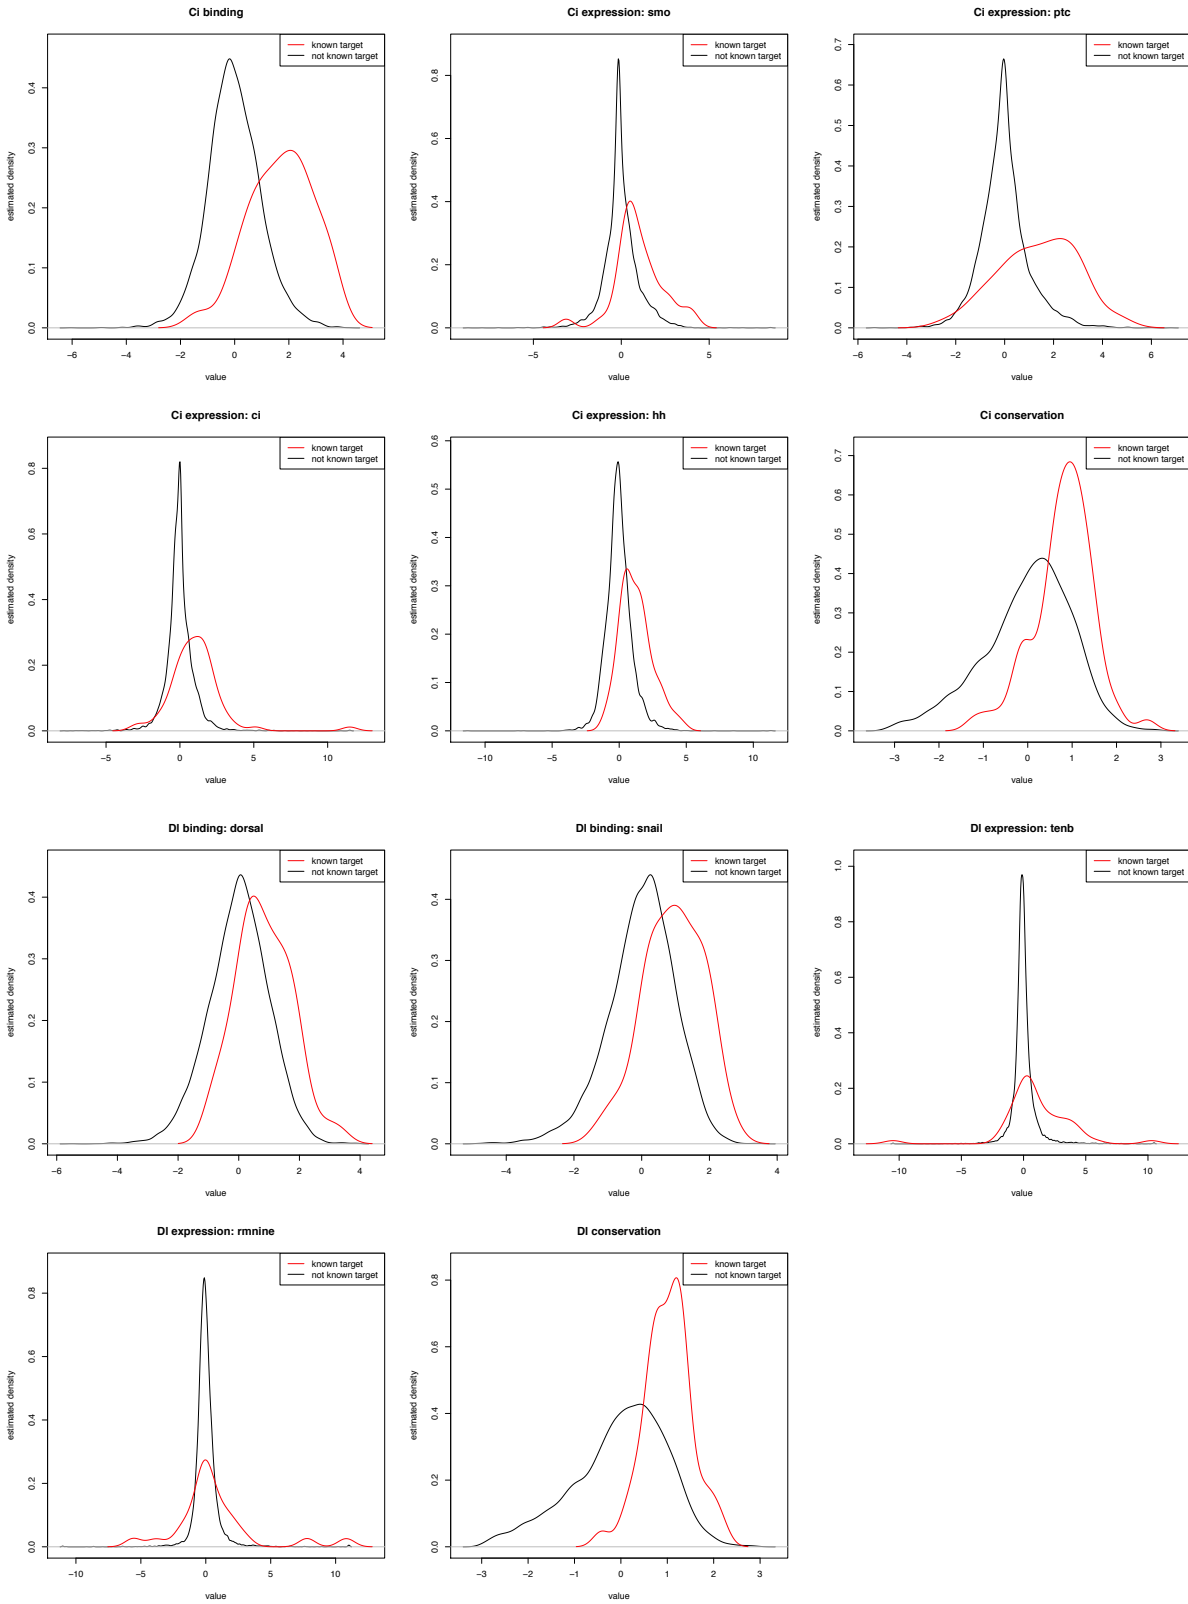

Supplementary Figure 1: Nonparametric density estimates for all Ci and DI data sources, for known target genes and genes of unknown target status. In DI expression, “tenb” refers to *pipe<sup>-</sup>/pipe<sup>-</sup>* vs. *Toll<sup>10B</sup>*, while “rmnine” refers to *pipe<sup>-</sup>/pipe<sup>-</sup>* vs. *Toll<sup>rm9</sup>/Toll<sup>rm10</sup>*.

Supplementary Table 1: Marginal data simulation parameters.

| type         | dimension | number of components | component probabilities                              | component means                                                                                   | component variances                                                                              |
|--------------|-----------|----------------------|------------------------------------------------------|---------------------------------------------------------------------------------------------------|--------------------------------------------------------------------------------------------------|
| binding      | 1         | 2                    | $\begin{pmatrix} 0.03 \\ 0.97 \end{pmatrix}$         | $\begin{pmatrix} 0.825 \\ -0.825 \end{pmatrix}$                                                   | $\begin{pmatrix} 1.50 \\ 0.50 \end{pmatrix}$                                                     |
| expression   | 3         | 3                    | $\begin{pmatrix} 0.05 \\ 0.92 \\ 0.03 \end{pmatrix}$ | $\begin{pmatrix} 1.50 & 1.50 & 1.50 \\ 0.00 & 0.00 & 0.00 \\ -1.50 & -1.50 & -1.50 \end{pmatrix}$ | $\begin{pmatrix} 3.00 & 1.00 & -0.50 \\ 1.00 & 3.00 & 0.00 \\ -0.50 & 0.00 & 3.00 \end{pmatrix}$ |
| conservation | 1         | 2                    | $\begin{pmatrix} 0.25 \\ 0.75 \end{pmatrix}$         | $\begin{pmatrix} 1.25 \\ -1.25 \end{pmatrix}$                                                     | $\begin{pmatrix} 1.50 \\ 0.50 \end{pmatrix}$                                                     |

Supplementary Table 2: ICL-BIC and ROC AUC results for joint model fits to simulated data. Compare to Table 1 in the main paper, particularly subtable (c). ICL-BIC is strongly biased toward the chained model and is much less likely than BIC to select the model with the highest ROC AUC.

(a) Mean (and standard error) of ICL-BIC for layered and chained fits to data generated from layered and chained topologies. Higher (less negative) values are preferred. The “difference” row shows the difference between ICL-BICs for correct vs. incorrect fit topologies.

|             | layered gen.     | chained gen.     |
|-------------|------------------|------------------|
| layered fit | -170030.2(187.5) | -155617.0(135.7) |
| chained fit | -166421.1(132.5) | -154650.1(87.1)  |
| difference  | -3609.0(94.5)    | 966.9(107.3)     |

(b) Mean (and standard error) of ROC AUC for layered and chained fits, joint fit selected by ICL-BIC, and marginal fits to data generated from layered and chained topologies.

|              | layered gen.  | chained gen.  |
|--------------|---------------|---------------|
| layered fit  | 0.881(0.0007) | 0.854(0.0009) |
| chained fit  | 0.838(0.0009) | 0.877(0.0008) |
| selected fit | 0.839(0.0010) | 0.877(0.0008) |

(c) Proportions of correct choices for layered and chained fits to data generated from the corresponding topologies (ICL-BIC, ROC AUC) and of the fit selected by ICL-BIC being best by ROC AUC (“conditional”).

|             | ICL-BIC | ROC AUC | conditional |
|-------------|---------|---------|-------------|
| layered fit | 0.017   | 1.000   | 0.600       |
| chained fit | 0.983   | 0.993   | 0.498       |

Supplementary Table 3: Results of the marginal model selection procedure by ICL-BIC for Ci and DI data. “ $K_{\text{sel}}$ ” denotes the selected number of components while “family” denotes the selected distribution family.

| data            | normal, $K = 2$ | normal, $K = 3$ | $K_{\text{sel}}$ | PVII, $K = K_{\text{sel}}$ | family |
|-----------------|-----------------|-----------------|------------------|----------------------------|--------|
| Ci binding      | -41125.58       | -42961.09       | 2                | -40367.84                  | PVII   |
| Ci expression   | -102701.05      | -99883.38       | 3                | -102939.13                 | normal |
| Ci conservation | -38834.12       | -45025.59       | 2                | -34740.74                  | PVII   |
| DI binding      | -62318.74       | -71849.10       | 2                | -65808.63                  | normal |
| DI expression   | -55081.15       | -60665.64       | 2                | -62649.57                  | normal |
| DI conservation | -49795.43       | -52554.07       | 2                | -43768.86                  | PVII   |

Supplementary Table 4: Results of the joint model selection procedure by BIC for Ci and DI data, with the marginal model specifications selected by ICL-BIC as shown in Supplementary Table 3.

| data | layered   | chained   | selected |
|------|-----------|-----------|----------|
| Ci   | -152248.5 | -152243.3 | chained  |
| DI   | -144180.1 | -144282.1 | layered  |

Supplementary Table 5: Fitted model parameters for data types modeled as marginally PVII, from chained model for Ci and layered model for DI.

| data            | dimension | number of components | component probabilities                        | component means                                 | component scales                               | component shapes                               |
|-----------------|-----------|----------------------|------------------------------------------------|-------------------------------------------------|------------------------------------------------|------------------------------------------------|
| Ci binding      | 1         | 2                    | $\begin{pmatrix} 0.303 \\ 0.697 \end{pmatrix}$ | $\begin{pmatrix} 0.650 \\ -0.280 \end{pmatrix}$ | $\begin{pmatrix} 2.412 \\ 1.591 \end{pmatrix}$ | $\begin{pmatrix} 3.447 \\ 3.062 \end{pmatrix}$ |
| Ci conservation | 1         | 2                    | $\begin{pmatrix} 0.654 \\ 0.346 \end{pmatrix}$ | $\begin{pmatrix} 0.458 \\ -0.859 \end{pmatrix}$ | $\begin{pmatrix} 1.854 \\ 4.022 \end{pmatrix}$ | $\begin{pmatrix} 4.740 \\ 5.562 \end{pmatrix}$ |
| DI conservation | 1         | 2                    | $\begin{pmatrix} 0.636 \\ 0.364 \end{pmatrix}$ | $\begin{pmatrix} 0.490 \\ -0.851 \end{pmatrix}$ | $\begin{pmatrix} 1.908 \\ 4.551 \end{pmatrix}$ | $\begin{pmatrix} 5.167 \\ 6.289 \end{pmatrix}$ |

Supplementary Table 6: Fitted model parameters for data types modeled as marginally normal, from chained model for Ci and layered model for DI.

| data          | dimension | number of components | component probabilities                                 | component means                                                                                                                                              | component variances                                                                                                                                                                         |
|---------------|-----------|----------------------|---------------------------------------------------------|--------------------------------------------------------------------------------------------------------------------------------------------------------------|---------------------------------------------------------------------------------------------------------------------------------------------------------------------------------------------|
| Ci expression | 4         | 3                    | $\begin{pmatrix} 0.136 \\ 0.621 \\ 0.243 \end{pmatrix}$ | $\begin{pmatrix} smo & pic & ci & hh \\ -0.114 & 0.047 & 0.196 & 0.377 \\ -0.113 & 0.025 & 0.006 & -0.080 \\ 0.355 & -0.089 & -0.125 & -0.008 \end{pmatrix}$ | $\begin{pmatrix} smo & pic & ci & hh \\ 3.346 & 0.198 & -0.581 & 1.033 \\ 0.198 & 2.427 & 1.255 & 0.493 \\ -0.581 & 1.255 & 4.542 & 0.355 \\ 1.033 & 0.493 & 0.355 & 2.957 \end{pmatrix}$   |
|               |           |                      |                                                         |                                                                                                                                                              | $\begin{pmatrix} smo & pic & ci & hh \\ 0.397 & 0.133 & -0.005 & 0.216 \\ 0.133 & 1.015 & 0.395 & 0.151 \\ -0.005 & 0.395 & 0.577 & 0.163 \\ 0.216 & 0.151 & 0.163 & 0.848 \end{pmatrix}$   |
|               |           |                      |                                                         |                                                                                                                                                              | $\begin{pmatrix} smo & pic & ci & hh \\ 1.061 & 0.102 & -0.216 & 0.393 \\ 0.102 & 0.152 & 0.025 & 0.044 \\ -0.216 & 0.025 & 0.062 & -0.073 \\ 0.393 & 0.044 & -0.073 & 0.198 \end{pmatrix}$ |
| DI binding    | 2         | 2                    | $\begin{pmatrix} 0.673 \\ 0.327 \end{pmatrix}$          | $\begin{pmatrix} dorsal & snail \\ 0.294 & 0.319 \\ -0.606 & -0.657 \end{pmatrix}$                                                                           | $\begin{pmatrix} dorsal & snail \\ 0.670 & 0.583 \\ 0.583 & 0.637 \end{pmatrix}$                                                                                                            |
|               |           |                      |                                                         |                                                                                                                                                              | $\begin{pmatrix} dorsal & snail \\ 1.133 & 0.879 \\ 0.879 & 1.104 \end{pmatrix}$                                                                                                            |
| DI expression | 2         | 2                    | $\begin{pmatrix} 0.162 \\ 0.838 \end{pmatrix}$          | $\begin{pmatrix} tenb & rmine \\ 0.391 & 0.361 \\ -0.076 & -0.070 \end{pmatrix}$                                                                             | $\begin{pmatrix} tenb & rmine \\ 5.031 & 2.221 \\ 2.221 & 4.910 \end{pmatrix}$                                                                                                              |
|               |           |                      |                                                         |                                                                                                                                                              | $\begin{pmatrix} tenb & rmine \\ 0.185 & 0.070 \\ 0.070 & 0.214 \end{pmatrix}$                                                                                                              |

Supplementary Table 7: Posterior probability cutoff (and corresponding fdr) for top 200 genes identified by joint and marginal models for each data set.

|    | joint        | binding      | expression   | conservation |
|----|--------------|--------------|--------------|--------------|
| Ci | 0.808(0.192) | 0.858(0.142) | 1.000(0.000) | 0.974(0.026) |
| DI | 0.985(0.015) | 0.949(0.051) | 1.000(0.000) | 0.991(0.009) |

Supplementary Table 8: Model ranks for all KEGG (Kanehisa and Goto, 2000; Kanehisa et al., 2012) Hedgehog pathway genes, for Ci data set. Boldface indicates ranks  $\leq 200$ . Some genes, such as *wntd*, *ci*, *pka-c3*, and *su(fu)*, are highly ranked by expression, but not by the joint model. These are genes whose expression appears to be regulated by one or more of Smo, Ptc, Ci, and Hh, but which are neither direct Ci binding targets nor highly conserved. The expression-regulation pathways for these genes may involve several intermediate steps, which cannot be elucidated from the current data sets.

| gene symbol   | joint      | binding   | expression | conservation |
|---------------|------------|-----------|------------|--------------|
| <i>hh</i>     | <b>12</b>  | <b>79</b> | <b>111</b> | 2461         |
| <i>wg</i>     | <b>40</b>  | 407       | <b>99</b>  | 754          |
| <i>smo</i>    | <b>71</b>  | 570       | <b>182</b> | 1450         |
| <i>wntd</i>   | <b>127</b> | 848       | 339        | 3287         |
| <i>ckia</i>   | 228        | 437       | 1420       | 402          |
| <i>ptc</i>    | 468        | 517       | 6145       | 219          |
| <i>wnt6</i>   | 631        | 683       | 2573       | 4018         |
| <i>cos</i>    | 746        | 765       | 6515       | 4459         |
| <i>gbb</i>    | 2155       | 2227      | 5225       | 3528         |
| <i>ci</i>     | 2326       | 3917      | <b>23</b>  | 3076         |
| <i>pka-c1</i> | 2782       | 3354      | 1444       | 1723         |
| <i>rab23</i>  | 3200       | 3384      | 4163       | 1225         |
| <i>sgg</i>    | 3668       | 3848      | 5322       | 1387         |
| <i>gish</i>   | 4021       | 4621      | 1589       | 426          |
| <i>fu</i>     | 4214       | 4398      | 6051       | 1139         |
| <i>pka-c2</i> | 4596       | 2932      | 7910       | 5134         |
| <i>dco</i>    | 5375       | 5666      | 3486       | 886          |
| <i>pka-c3</i> | 5425       | 9170      | 359        | 5312         |
| <i>su(fu)</i> | 5695       | 9813      | 225        | 5843         |
| <i>dpp</i>    | 6972       | 10244     | 1122       | 3224         |
| <i>slmb</i>   | 7403       | 8057      | 3126       | 802          |
| <i>wnt5</i>   | 8129       | 9260      | 2922       | 2971         |
| <i>wnt10</i>  | 9710       | 8951      | 9125       | 1399         |



Supplementary Table 9: Top 50 GO FAT BP (Huang et al., 2009a,b) terms from the top 200 genes from the joint model for all Ci data. The “count” column gives the number of genes annotated with the term. Bold IDs indicate “overenriched” terms, that is, terms which are not present in the marginal lists, or are more strongly enriched in the joint lists than in the marginal lists.

| ID                | name                                                   | <i>p</i> -value | count |
|-------------------|--------------------------------------------------------|-----------------|-------|
| <b>GO:0001708</b> | cell fate specification                                | 4.063e-12       | 15    |
| GO:0045165        | cell fate commitment                                   | 4.451e-12       | 25    |
| <b>GO:0007389</b> | pattern specification process                          | 5.315e-12       | 35    |
| GO:0001709        | cell fate determination                                | 1.764e-11       | 19    |
| <b>GO:0003002</b> | regionalization                                        | 2.913e-11       | 33    |
| GO:0045449        | regulation of transcription                            | 4.620e-11       | 44    |
| GO:0006355        | regulation of transcription, DNA-dependent             | 5.632e-11       | 38    |
| GO:0051252        | regulation of RNA metabolic process                    | 1.058e-09       | 38    |
| <b>GO:0007423</b> | sensory organ development                              | 5.877e-09       | 28    |
| <b>GO:0035218</b> | leg disc development                                   | 2.332e-08       | 11    |
| GO:0007365        | periodic partitioning                                  | 4.165e-08       | 11    |
| <b>GO:0007560</b> | imaginal disc morphogenesis                            | 4.951e-08       | 22    |
| <b>GO:0048563</b> | post-embryonic organ morphogenesis                     | 4.951e-08       | 22    |
| <b>GO:0007422</b> | peripheral nervous system development                  | 6.373e-08       | 13    |
| GO:0006357        | regulation of transcription from RNA polymerase II ... | 7.833e-08       | 18    |
| <b>GO:0048707</b> | instar larval or pupal morphogenesis                   | 8.164e-08       | 24    |
| <b>GO:0048569</b> | post-embryonic organ development                       | 1.070e-07       | 22    |
| <b>GO:0009886</b> | post-embryonic morphogenesis                           | 1.117e-07       | 24    |
| <b>GO:0007424</b> | open tracheal system development                       | 1.255e-07       | 16    |
| <b>GO:0060541</b> | respiratory system development                         | 1.255e-07       | 16    |
| <b>GO:0007552</b> | metamorphosis                                          | 1.765e-07       | 24    |
| GO:0007444        | imaginal disc development                              | 4.618e-07       | 25    |
| <b>GO:0045596</b> | negative regulation of cell differentiation            | 1.035e-06       | 11    |
| <b>GO:0048859</b> | formation of anatomical boundary                       | 1.154e-06       | 9     |
| GO:0045941        | positive regulation of transcription                   | 1.369e-06       | 13    |
| <b>GO:0007447</b> | imaginal disc pattern formation                        | 1.384e-06       | 12    |
| GO:0010628        | positive regulation of gene expression                 | 1.501e-06       | 13    |
| <b>GO:0007449</b> | proximal/distal pattern formation, imaginal disc       | 1.572e-06       | 7     |
| <b>GO:0035114</b> | imaginal disc-derived appendage morphogenesis          | 1.785e-06       | 18    |
| <b>GO:0035107</b> | appendage morphogenesis                                | 2.120e-06       | 18    |
| GO:0051173        | positive regulation of nitrogen compound metabolic ... | 2.152e-06       | 13    |
| GO:0045935        | positive regulation of nucleobase, nucleoside, ...     | 2.152e-06       | 13    |
| <b>GO:0002165</b> | instar larval or pupal development                     | 2.218e-06       | 24    |
| <b>GO:0048737</b> | imaginal disc-derived appendage development            | 2.243e-06       | 18    |
| <b>GO:0048736</b> | appendage development                                  | 2.654e-06       | 18    |
| <b>GO:0009954</b> | proximal/distal pattern formation                      | 2.837e-06       | 7     |
| GO:0045944        | positive regulation of transcription from RNA ...      | 3.181e-06       | 9     |
| <b>GO:0007155</b> | cell adhesion                                          | 3.699e-06       | 15    |
| <b>GO:0009791</b> | post-embryonic development                             | 4.191e-06       | 24    |
| GO:0010557        | positive regulation of macromolecule biosynthetic ...  | 4.236e-06       | 13    |
| GO:0031328        | positive regulation of cellular biosynthetic ...       | 4.587e-06       | 14    |
| GO:0009891        | positive regulation of biosynthetic process            | 4.587e-06       | 14    |
| GO:0045893        | positive regulation of transcription, ...              | 4.590e-06       | 11    |
| <b>GO:0007400</b> | neuroblast fate determination                          | 4.827e-06       | 7     |
| <b>GO:0010160</b> | formation of organ boundary                            | 5.055e-06       | 8     |
| GO:0009880        | embryonic pattern specification                        | 5.177e-06       | 17    |
| <b>GO:0051301</b> | cell division                                          | 5.328e-06       | 16    |
| GO:0035282        | segmentation                                           | 5.620e-06       | 18    |
| GO:0051254        | positive regulation of RNA metabolic process           | 5.636e-06       | 11    |
| <b>GO:0048645</b> | organ formation                                        | 7.240e-06       | 8     |

Supplementary Table 10: Top 50 GO FAT BP terms from the top 200 genes from the marginal model for Ci binding data.

| ID         | name                                                   | <i>p</i> -value | count |
|------------|--------------------------------------------------------|-----------------|-------|
| GO:0006355 | regulation of transcription, DNA-dependent             | 1.149e-23       | 51    |
| GO:0045449 | regulation of transcription                            | 1.680e-23       | 57    |
| GO:0051252 | regulation of RNA metabolic process                    | 1.162e-21       | 51    |
| GO:0045165 | cell fate commitment                                   | 2.073e-17       | 29    |
| GO:0048598 | embryonic morphogenesis                                | 1.170e-14       | 26    |
| GO:0006350 | transcription                                          | 1.195e-13       | 34    |
| GO:0001709 | cell fate determination                                | 1.322e-13       | 20    |
| GO:0030182 | neuron differentiation                                 | 1.889e-13       | 32    |
| GO:0006357 | regulation of transcription from RNA polymerase II ... | 2.668e-13       | 23    |
| GO:0007498 | mesoderm development                                   | 7.603e-13       | 17    |
| GO:0007366 | periodic partitioning by pair rule gene                | 4.418e-12       | 9     |
| GO:0048666 | neuron development                                     | 4.899e-12       | 28    |
| GO:0048729 | tissue morphogenesis                                   | 5.969e-12       | 24    |
| GO:0048812 | neuron projection morphogenesis                        | 1.828e-11       | 25    |
| GO:0031175 | neuron projection development                          | 1.969e-11       | 25    |
| GO:0048667 | cell morphogenesis involved in neuron ...              | 2.120e-11       | 25    |
| GO:0048858 | cell projection morphogenesis                          | 3.142e-11       | 26    |
| GO:0000902 | cell morphogenesis                                     | 4.762e-11       | 30    |
| GO:0007507 | heart development                                      | 4.848e-11       | 14    |
| GO:0000904 | cell morphogenesis involved in differentiation         | 6.198e-11       | 25    |
| GO:0032990 | cell part morphogenesis                                | 6.553e-11       | 26    |
| GO:0007389 | pattern specification process                          | 6.920e-11       | 31    |
| GO:0006928 | cell motion                                            | 7.116e-11       | 25    |
| GO:0007369 | gastrulation                                           | 8.538e-11       | 14    |
| GO:0001708 | cell fate specification                                | 2.005e-10       | 13    |
| GO:0003002 | regionalization                                        | 4.632e-10       | 29    |
| GO:0030030 | cell projection organization                           | 5.301e-10       | 26    |
| GO:0007365 | periodic partitioning                                  | 6.617e-10       | 12    |
| GO:0035289 | posterior head segmentation                            | 1.391e-09       | 8     |
| GO:0001710 | mesodermal cell fate commitment                        | 1.391e-09       | 8     |
| GO:0048333 | mesodermal cell differentiation                        | 1.391e-09       | 8     |
| GO:0032989 | cellular component morphogenesis                       | 2.066e-09       | 30    |
| GO:0016477 | cell migration                                         | 2.319e-09       | 18    |
| GO:0000122 | negative regulation of transcription from RNA ...      | 2.627e-09       | 12    |
| GO:0009880 | embryonic pattern specification                        | 4.100e-09       | 20    |
| GO:0001707 | mesoderm formation                                     | 4.498e-09       | 9     |
| GO:0048732 | gland development                                      | 6.126e-09       | 17    |
| GO:0048332 | mesoderm morphogenesis                                 | 6.305e-09       | 9     |
| GO:0048870 | cell motility                                          | 6.425e-09       | 18    |
| GO:0051674 | localization of cell                                   | 1.311e-08       | 18    |
| GO:0045893 | positive regulation of transcription, ...              | 1.338e-08       | 13    |
| GO:0001704 | formation of primary germ layer                        | 1.596e-08       | 9     |
| GO:0051254 | positive regulation of RNA metabolic process           | 1.736e-08       | 13    |
| GO:0035287 | head segmentation                                      | 2.319e-08       | 8     |
| GO:0007444 | imaginal disc development                              | 3.046e-08       | 25    |
| GO:0045941 | positive regulation of transcription                   | 3.640e-08       | 14    |
| GO:0048813 | dendrite morphogenesis                                 | 4.039e-08       | 14    |
| GO:0010628 | positive regulation of gene expression                 | 4.039e-08       | 14    |
| GO:0016358 | dendrite development                                   | 4.039e-08       | 14    |
| GO:0035295 | tube development                                       | 5.182e-08       | 13    |

Supplementary Table 11: Top 50 GO FAT BP terms from the top 200 genes from the marginal model for Ci expression data.

| ID         | name                                                 | <i>p</i> -value | count |
|------------|------------------------------------------------------|-----------------|-------|
| GO:0035161 | imaginal disc lineage restriction                    | 5.934e-06       | 5     |
| GO:0007367 | segment polarity determination                       | 1.123e-05       | 7     |
| GO:0048100 | wing disc anterior/posterior pattern formation       | 1.959e-05       | 5     |
| GO:0007447 | imaginal disc pattern formation                      | 3.892e-05       | 9     |
| GO:0007365 | periodic partitioning                                | 7.558e-05       | 7     |
| GO:0035224 | genital disc anterior/posterior pattern formation    | 1.235e-04       | 4     |
| GO:0035221 | genital disc pattern formation                       | 1.235e-04       | 4     |
| GO:0007448 | anterior/posterior pattern formation, imaginal ...   | 1.235e-04       | 5     |
| GO:0009880 | embryonic pattern specification                      | 2.437e-04       | 12    |
| GO:0035222 | wing disc pattern formation                          | 2.754e-04       | 7     |
| GO:0007350 | blastoderm segmentation                              | 6.334e-04       | 11    |
| GO:0035282 | segmentation                                         | 6.667e-04       | 12    |
| GO:0007224 | smoothened signaling pathway                         | 9.129e-04       | 5     |
| GO:0003002 | regionalization                                      | 9.608e-04       | 16    |
| GO:0035217 | labial disc development                              | 1.042e-03       | 3     |
| GO:0048099 | anterior/posterior lineage restriction, imaginal ... | 1.042e-03       | 3     |
| GO:0007389 | pattern specification process                        | 1.681e-03       | 16    |
| GO:0035277 | spiracle morphogenesis, open tracheal system         | 1.920e-03       | 4     |
| GO:0016055 | Wnt receptor signaling pathway                       | 2.502e-03       | 6     |
| GO:0007449 | proximal/distal pattern formation, imaginal disc     | 2.585e-03       | 4     |
| GO:0007446 | imaginal disc growth                                 | 2.964e-03       | 4     |
| GO:0035265 | organ growth                                         | 3.376e-03       | 4     |
| GO:0009954 | proximal/distal pattern formation                    | 3.376e-03       | 4     |
| GO:0007473 | wing disc proximal/distal pattern formation          | 3.552e-03       | 3     |
| GO:0007424 | open tracheal system development                     | 4.272e-03       | 8     |
| GO:0060541 | respiratory system development                       | 4.272e-03       | 8     |
| GO:0045168 | cell-cell signaling involved in cell fate ...        | 4.694e-03       | 3     |
| GO:0035288 | anterior head segmentation                           | 4.694e-03       | 3     |
| GO:0007418 | ventral midline development                          | 4.694e-03       | 3     |
| GO:0000902 | cell morphogenesis                                   | 5.782e-03       | 14    |
| GO:0030707 | ovarian follicle cell development                    | 5.814e-03       | 9     |
| GO:0035215 | genital disc development                             | 5.951e-03       | 4     |
| GO:0003006 | reproductive developmental process                   | 7.138e-03       | 15    |
| GO:0009952 | anterior/posterior pattern formation                 | 7.538e-03       | 8     |
| GO:0055114 | oxidation reduction                                  | 7.810e-03       | 17    |
| GO:0007444 | imaginal disc development                            | 8.586e-03       | 13    |
| GO:0007166 | cell surface receptor linked signal transduction     | 8.793e-03       | 17    |
| GO:0030030 | cell projection organization                         | 9.245e-03       | 12    |
| GO:0001708 | cell fate specification                              | 9.263e-03       | 5     |
| GO:0007411 | axon guidance                                        | 9.544e-03       | 7     |
| GO:0048858 | cell projection morphogenesis                        | 1.019e-02       | 11    |
| GO:0045165 | cell fate commitment                                 | 1.219e-02       | 9     |
| GO:0044271 | nitrogen compound biosynthetic process               | 1.249e-02       | 9     |
| GO:0007090 | regulation of S phase of mitotic cell cycle          | 1.252e-02       | 3     |
| GO:0007440 | foregut morphogenesis                                | 1.252e-02       | 3     |
| GO:0032990 | cell part morphogenesis                              | 1.272e-02       | 11    |
| GO:0002164 | larval development                                   | 1.273e-02       | 5     |
| GO:0001654 | eye development                                      | 1.297e-02       | 11    |
| GO:0048812 | neuron projection morphogenesis                      | 1.399e-02       | 10    |
| GO:0031175 | neuron projection development                        | 1.429e-02       | 10    |

Supplementary Table 12: Top 50 GO FAT BP terms from the top 200 genes from the marginal model for Ci conservation data.

| ID         | name                                            | <i>p</i> -value | count |
|------------|-------------------------------------------------|-----------------|-------|
| GO:0030182 | neuron differentiation                          | 1.963e-06       | 25    |
| GO:0046530 | photoreceptor cell differentiation              | 9.391e-06       | 13    |
| GO:0048666 | neuron development                              | 1.988e-05       | 21    |
| GO:0002165 | instar larval or pupal development              | 3.055e-05       | 23    |
| GO:0009791 | post-embryonic development                      | 5.401e-05       | 23    |
| GO:0048707 | instar larval or pupal morphogenesis            | 6.557e-05       | 20    |
| GO:0000902 | cell morphogenesis                              | 7.096e-05       | 23    |
| GO:0009886 | post-embryonic morphogenesis                    | 8.253e-05       | 20    |
| GO:0032989 | cellular component morphogenesis                | 1.005e-04       | 25    |
| GO:0001754 | eye photoreceptor cell differentiation          | 1.089e-04       | 11    |
| GO:0007552 | metamorphosis                                   | 1.153e-04       | 20    |
| GO:0000904 | cell morphogenesis involved in differentiation  | 1.210e-04       | 18    |
| GO:0006350 | transcription                                   | 1.236e-04       | 23    |
| GO:0007560 | imaginal disc morphogenesis                     | 1.844e-04       | 17    |
| GO:0048563 | post-embryonic organ morphogenesis              | 1.844e-04       | 17    |
| GO:0007423 | sensory organ development                       | 2.039e-04       | 21    |
| GO:0048667 | cell morphogenesis involved in neuron ...       | 2.164e-04       | 17    |
| GO:0000278 | mitotic cell cycle                              | 2.995e-04       | 19    |
| GO:0048569 | post-embryonic organ development                | 3.066e-04       | 17    |
| GO:0048592 | eye morphogenesis                               | 3.295e-04       | 16    |
| GO:0042063 | gliogenesis                                     | 3.722e-04       | 7     |
| GO:0001751 | compound eye photoreceptor cell differentiation | 3.832e-04       | 10    |
| GO:0007010 | cytoskeleton organization                       | 4.016e-04       | 22    |
| GO:0006796 | phosphate metabolic process                     | 6.396e-04       | 24    |
| GO:0006793 | phosphorus metabolic process                    | 6.396e-04       | 24    |
| GO:0016310 | phosphorylation                                 | 8.710e-04       | 20    |
| GO:0000022 | mitotic spindle elongation                      | 9.439e-04       | 8     |
| GO:0051231 | spindle elongation                              | 1.018e-03       | 8     |
| GO:0030030 | cell projection organization                    | 1.052e-03       | 18    |
| GO:0060284 | regulation of cell development                  | 1.273e-03       | 10    |
| GO:0007049 | cell cycle                                      | 1.277e-03       | 25    |
| GO:0007017 | microtubule-based process                       | 1.315e-03       | 19    |
| GO:0001745 | compound eye morphogenesis                      | 1.570e-03       | 14    |
| GO:0042461 | photoreceptor cell development                  | 1.608e-03       | 7     |
| GO:0048812 | neuron projection morphogenesis                 | 1.847e-03       | 15    |
| GO:0031175 | neuron projection development                   | 1.909e-03       | 15    |
| GO:0048598 | embryonic morphogenesis                         | 1.991e-03       | 13    |
| GO:0006468 | protein amino acid phosphorylation              | 2.151e-03       | 14    |
| GO:0051252 | regulation of RNA metabolic process             | 2.166e-03       | 26    |
| GO:0048813 | dendrite morphogenesis                          | 2.432e-03       | 9     |
| GO:0016358 | dendrite development                            | 2.432e-03       | 9     |
| GO:0000226 | microtubule cytoskeleton organization           | 2.701e-03       | 15    |
| GO:0001654 | eye development                                 | 2.789e-03       | 16    |
| GO:0007444 | imaginal disc development                       | 3.794e-03       | 18    |
| GO:0003002 | regionalization                                 | 4.430e-03       | 19    |
| GO:0048858 | cell projection morphogenesis                   | 5.106e-03       | 15    |
| GO:0007051 | spindle organization                            | 5.688e-03       | 12    |
| GO:0007052 | mitotic spindle organization                    | 5.747e-03       | 11    |
| GO:0032990 | cell part morphogenesis                         | 6.838e-03       | 15    |
| GO:0035272 | exocrine system development                     | 6.927e-03       | 9     |

Supplementary Table 13: Top 50 GO FAT BP terms from genes with  $\text{fdr} \leq 0.2$  from the joint model for all Ci data. 234 genes are represented.

| ID         | name                                                   | <i>p</i> -value | count |
|------------|--------------------------------------------------------|-----------------|-------|
| GO:0045165 | cell fate commitment                                   | 5.096e-14       | 29    |
| GO:0001708 | cell fate specification                                | 1.122e-13       | 17    |
| GO:0007389 | pattern specification process                          | 1.795e-13       | 40    |
| GO:0003002 | regionalization                                        | 7.776e-13       | 38    |
| GO:0006355 | regulation of transcription, DNA-dependent             | 5.265e-12       | 43    |
| GO:0045449 | regulation of transcription                            | 1.370e-11       | 49    |
| GO:0051252 | regulation of RNA metabolic process                    | 1.448e-10       | 43    |
| GO:0001709 | cell fate determination                                | 2.060e-10       | 19    |
| GO:0006357 | regulation of transcription from RNA polymerase II ... | 3.866e-09       | 21    |
| GO:0048563 | post-embryonic organ morphogenesis                     | 6.688e-09       | 25    |
| GO:0007560 | imaginal disc morphogenesis                            | 6.688e-09       | 25    |
| GO:0007423 | sensory organ development                              | 9.243e-09       | 30    |
| GO:0007365 | periodic partitioning                                  | 1.358e-08       | 12    |
| GO:0048569 | post-embryonic organ development                       | 1.615e-08       | 25    |
| GO:0048707 | instar larval or pupal morphogenesis                   | 1.845e-08       | 27    |
| GO:0009886 | post-embryonic morphogenesis                           | 2.627e-08       | 27    |
| GO:0007422 | peripheral nervous system development                  | 3.754e-08       | 14    |
| GO:0007552 | metamorphosis                                          | 4.395e-08       | 27    |
| GO:0035218 | leg disc development                                   | 9.337e-08       | 11    |
| GO:0007447 | imaginal disc pattern formation                        | 1.088e-07       | 14    |
| GO:0007424 | open tracheal system development                       | 1.453e-07       | 17    |
| GO:0060541 | respiratory system development                         | 1.453e-07       | 17    |
| GO:0007444 | imaginal disc development                              | 1.566e-07       | 28    |
| GO:0035114 | imaginal disc-derived appendage morphogenesis          | 1.593e-07       | 21    |
| GO:0035107 | appendage morphogenesis                                | 1.954e-07       | 21    |
| GO:0048737 | imaginal disc-derived appendage development            | 2.090e-07       | 21    |
| GO:0048736 | appendage development                                  | 2.553e-07       | 21    |
| GO:0048859 | formation of anatomical boundary                       | 2.859e-07       | 10    |
| GO:0045596 | negative regulation of cell differentiation            | 4.707e-07       | 12    |
| GO:0002165 | instar larval or pupal development                     | 7.537e-07       | 27    |
| GO:0007155 | cell adhesion                                          | 8.519e-07       | 17    |
| GO:0045944 | positive regulation of transcription from RNA ...      | 9.048e-07       | 10    |
| GO:0045941 | positive regulation of transcription                   | 1.022e-06       | 14    |
| GO:0010160 | formation of organ boundary                            | 1.062e-06       | 9     |
| GO:0010628 | positive regulation of gene expression                 | 1.129e-06       | 14    |
| GO:0009791 | post-embryonic development                             | 1.538e-06       | 27    |
| GO:0048645 | organ formation                                        | 1.611e-06       | 9     |
| GO:0051173 | positive regulation of nitrogen compound metabolic ... | 1.661e-06       | 14    |
| GO:0045935 | positive regulation of nucleobase, nucleoside, ...     | 1.661e-06       | 14    |
| GO:0048732 | gland development                                      | 1.888e-06       | 16    |
| GO:0009880 | embryonic pattern specification                        | 1.961e-06       | 19    |
| GO:0022610 | biological adhesion                                    | 2.392e-06       | 17    |
| GO:0045893 | positive regulation of transcription, ...              | 2.418e-06       | 12    |
| GO:0035282 | segmentation                                           | 2.622e-06       | 20    |
| GO:0051254 | positive regulation of RNA metabolic process           | 3.028e-06       | 12    |
| GO:0010557 | positive regulation of macromolecule biosynthetic ...  | 3.436e-06       | 14    |
| GO:0007449 | proximal/distal pattern formation, imaginal disc       | 3.673e-06       | 7     |
| GO:0031328 | positive regulation of cellular biosynthetic ...       | 4.515e-06       | 15    |
| GO:0009891 | positive regulation of biosynthetic process            | 4.515e-06       | 15    |
| GO:0035214 | eye-antennal disc development                          | 5.877e-06       | 10    |

Supplementary Table 14: KEGG pathways from selected genes from Ci gene lists.

(a) From top 200 genes from the joint model for all data.

| ID       | name                         | <i>p</i> -value | count |
|----------|------------------------------|-----------------|-------|
| dme04340 | Hedgehog signaling pathway   | 4.629e-03       | 4     |
| dme00600 | Sphingolipid metabolism      | 5.026e-02       | 3     |
| dme04320 | Dorso-ventral axis formation | 5.396e-02       | 3     |

(b) From top 200 genes from the marginal model for binding data.

| ID       | name                         | <i>p</i> -value | count |
|----------|------------------------------|-----------------|-------|
| dme04320 | Dorso-ventral axis formation | 3.048e-02       | 3     |

(c) From top 200 genes from the marginal model for expression data.

| ID       | name                                     | <i>p</i> -value | count |
|----------|------------------------------------------|-----------------|-------|
| dme04340 | Hedgehog signaling pathway               | 1.194e-02       | 4     |
| dme00260 | Glycine, serine and threonine metabolism | 9.108e-02       | 3     |
| dme00903 | Limonene and pinene degradation          | 9.588e-02       | 5     |

(d) From top 200 genes from the marginal model for conservation data.

| ID       | name     | <i>p</i> -value | count |
|----------|----------|-----------------|-------|
| dme03010 | Ribosome | 7.142e-03       | 8     |

(e) From genes with  $\text{fdr} \leq 0.2$  from the joint model for all data.

| ID       | name                                        | <i>p</i> -value | count |
|----------|---------------------------------------------|-----------------|-------|
| dme04340 | Hedgehog signaling pathway                  | 8.124e-04       | 5     |
| dme04320 | Dorso-ventral axis formation                | 1.133e-02       | 4     |
| dme00600 | Sphingolipid metabolism                     | 7.658e-02       | 3     |
| dme00250 | Alanine, aspartate and glutamate metabolism | 9.324e-02       | 3     |

Supplementary Table 15: Top 50 GO FAT BP terms from the top 200 genes from the joint model for all DI data. Note that all terms in the top 50 are overenriched compared to the marginal lists.

| ID         | name                                                   | <i>p</i> -value | count |
|------------|--------------------------------------------------------|-----------------|-------|
| GO:0007389 | pattern specification process                          | 3.604e-31       | 59    |
| GO:0003002 | regionalization                                        | 1.603e-27       | 54    |
| GO:0007444 | imaginal disc development                              | 8.535e-24       | 48    |
| GO:0045165 | cell fate commitment                                   | 1.051e-22       | 37    |
| GO:0007424 | open tracheal system development                       | 5.193e-22       | 31    |
| GO:0060541 | respiratory system development                         | 5.193e-22       | 31    |
| GO:0048729 | tissue morphogenesis                                   | 9.462e-22       | 37    |
| GO:0032989 | cellular component morphogenesis                       | 2.171e-20       | 49    |
| GO:0048598 | embryonic morphogenesis                                | 5.630e-20       | 34    |
| GO:0007423 | sensory organ development                              | 2.153e-19       | 43    |
| GO:0000902 | cell morphogenesis                                     | 5.311e-19       | 44    |
| GO:0048563 | post-embryonic organ morphogenesis                     | 1.002e-18       | 36    |
| GO:0007560 | imaginal disc morphogenesis                            | 1.002e-18       | 36    |
| GO:0030182 | neuron differentiation                                 | 1.407e-18       | 42    |
| GO:0060429 | epithelium development                                 | 1.885e-18       | 33    |
| GO:0009886 | post-embryonic morphogenesis                           | 2.865e-18       | 39    |
| GO:0002165 | instar larval or pupal development                     | 3.120e-18       | 42    |
| GO:0048569 | post-embryonic organ development                       | 4.287e-18       | 36    |
| GO:0002009 | morphogenesis of an epithelium                         | 4.880e-18       | 32    |
| GO:0048707 | instar larval or pupal morphogenesis                   | 1.189e-17       | 38    |
| GO:0009791 | post-embryonic development                             | 1.221e-17       | 42    |
| GO:0045449 | regulation of transcription                            | 1.811e-17       | 56    |
| GO:0007350 | blastoderm segmentation                                | 1.857e-17       | 31    |
| GO:0001654 | eye development                                        | 2.047e-17       | 37    |
| GO:0007552 | metamorphosis                                          | 4.862e-17       | 38    |
| GO:0035220 | wing disc development                                  | 4.954e-17       | 34    |
| GO:0051252 | regulation of RNA metabolic process                    | 5.152e-17       | 51    |
| GO:0006357 | regulation of transcription from RNA polymerase II ... | 5.234e-17       | 29    |
| GO:0009880 | embryonic pattern specification                        | 9.591e-17       | 31    |
| GO:0006355 | regulation of transcription, DNA-dependent             | 1.218e-16       | 48    |
| GO:0035282 | segmentation                                           | 3.251e-16       | 32    |
| GO:0001709 | cell fate determination                                | 4.460e-16       | 24    |
| GO:0048736 | appendage development                                  | 6.680e-16       | 31    |
| GO:0035120 | post-embryonic appendage morphogenesis                 | 7.674e-16       | 30    |
| GO:0048732 | gland development                                      | 9.690e-16       | 26    |
| GO:0035272 | exocrine system development                            | 2.665e-15       | 24    |
| GO:0007431 | salivary gland development                             | 2.665e-15       | 24    |
| GO:0035107 | appendage morphogenesis                                | 3.338e-15       | 30    |
| GO:0048737 | imaginal disc-derived appendage development            | 3.675e-15       | 30    |
| GO:0000904 | cell morphogenesis involved in differentiation         | 4.005e-15       | 33    |
| GO:0048666 | neuron development                                     | 4.653e-15       | 35    |
| GO:0006928 | cell motion                                            | 4.832e-15       | 33    |
| GO:0048667 | cell morphogenesis involved in neuron ...              | 6.721e-15       | 32    |
| GO:0035114 | imaginal disc-derived appendage morphogenesis          | 1.879e-14       | 29    |
| GO:0030030 | cell projection organization                           | 2.129e-14       | 35    |
| GO:0048812 | neuron projection morphogenesis                        | 3.946e-14       | 31    |
| GO:0031175 | neuron projection development                          | 4.334e-14       | 31    |
| GO:0007365 | periodic partitioning                                  | 7.617e-14       | 16    |
| GO:0035152 | regulation of tube architecture, open tracheal ...     | 1.795e-13       | 14    |
| GO:0032990 | cell part morphogenesis                                | 3.135e-13       | 32    |

Supplementary Table 16: Top 50 GO FAT BP terms from the top 200 genes from the marginal model for DI binding data.

| ID         | name                                                      | <i>p</i> -value | count |
|------------|-----------------------------------------------------------|-----------------|-------|
| GO:0045165 | cell fate commitment                                      | 9.753e-05       | 13    |
| GO:0007444 | imaginal disc development                                 | 6.347e-04       | 16    |
| GO:0007460 | R8 cell fate commitment                                   | 8.890e-04       | 4     |
| GO:0007389 | pattern specification process                             | 1.075e-03       | 17    |
| GO:0006357 | regulation of transcription from RNA polymerase II ...    | 1.511e-03       | 10    |
| GO:0045465 | R8 cell differentiation                                   | 1.610e-03       | 4     |
| GO:0001709 | cell fate determination                                   | 2.243e-03       | 8     |
| GO:0010557 | positive regulation of macromolecule biosynthetic ...     | 2.243e-03       | 8     |
| GO:0007447 | imaginal disc pattern formation                           | 2.285e-03       | 7     |
| GO:0001700 | embryonic development via the syncytial blastoderm        | 3.164e-03       | 10    |
| GO:0033554 | cellular response to stress                               | 3.340e-03       | 9     |
| GO:0007616 | long-term memory                                          | 3.465e-03       | 4     |
| GO:0010604 | positive regulation of macromolecule metabolic ...        | 3.842e-03       | 8     |
| GO:0009792 | embryonic development ending in birth or egg hatching ... | 4.280e-03       | 10    |
| GO:0003002 | regionalization                                           | 4.543e-03       | 15    |
| GO:0048190 | wing disc dorsal/ventral pattern formation                | 5.253e-03       | 5     |
| GO:0009891 | positive regulation of biosynthetic process               | 5.773e-03       | 8     |
| GO:0060541 | respiratory system development                            | 5.773e-03       | 8     |
| GO:0007424 | open tracheal system development                          | 5.773e-03       | 8     |
| GO:0031328 | positive regulation of cellular biosynthetic ...          | 5.773e-03       | 8     |
| GO:0060429 | epithelium development                                    | 5.841e-03       | 10    |
| GO:0051252 | regulation of RNA metabolic process                       | 6.384e-03       | 19    |
| GO:0048729 | tissue morphogenesis                                      | 8.012e-03       | 10    |
| GO:0048732 | gland development                                         | 8.088e-03       | 8     |
| GO:0007450 | dorsal/ventral pattern formation, imaginal disc           | 8.358e-03       | 5     |
| GO:0042127 | regulation of cell proliferation                          | 8.358e-03       | 5     |
| GO:0048477 | oogenesis                                                 | 8.463e-03       | 16    |
| GO:0051726 | regulation of cell cycle                                  | 8.901e-03       | 8     |
| GO:0000902 | cell morphogenesis                                        | 9.132e-03       | 14    |
| GO:0007419 | ventral cord development                                  | 9.225e-03       | 4     |
| GO:0007292 | female gamete generation                                  | 9.478e-03       | 16    |
| GO:0010629 | negative regulation of gene expression                    | 1.001e-02       | 10    |
| GO:0060284 | regulation of cell development                            | 1.037e-02       | 7     |
| GO:0001736 | establishment of planar polarity                          | 1.058e-02       | 5     |
| GO:0006928 | cell motion                                               | 1.074e-02       | 11    |
| GO:0007391 | dorsal closure                                            | 1.084e-02       | 6     |
| GO:0001708 | cell fate specification                                   | 1.119e-02       | 5     |
| GO:0007164 | establishment of tissue polarity                          | 1.119e-02       | 5     |
| GO:0006355 | regulation of transcription, DNA-dependent                | 1.163e-02       | 17    |
| GO:0007346 | regulation of mitotic cell cycle                          | 1.229e-02       | 6     |
| GO:0006096 | glycolysis                                                | 1.290e-02       | 4     |
| GO:0010605 | negative regulation of macromolecule metabolic ...        | 1.381e-02       | 11    |
| GO:0007298 | border follicle cell migration                            | 1.385e-02       | 5     |
| GO:0032989 | cellular component morphogenesis                          | 1.385e-02       | 15    |
| GO:0007366 | periodic partitioning by pair rule gene                   | 1.391e-02       | 3     |
| GO:0007613 | memory                                                    | 1.393e-02       | 4     |
| GO:0046843 | dorsal appendage formation                                | 1.393e-02       | 4     |
| GO:0002009 | morphogenesis of an epithelium                            | 1.401e-02       | 9     |
| GO:0048598 | embryonic morphogenesis                                   | 1.436e-02       | 9     |
| GO:0002165 | instar larval or pupal development                        | 1.450e-02       | 13    |



Supplementary Table 17: Top 50 GO FAT BP terms from the top 200 genes from the marginal model for DI expression data.

| ID         | name                                          | <i>p</i> -value | count |
|------------|-----------------------------------------------|-----------------|-------|
| GO:0048729 | tissue morphogenesis                          | 5.251e-21       | 34    |
| GO:0007507 | heart development                             | 4.074e-17       | 19    |
| GO:0001708 | cell fate specification                       | 3.137e-15       | 17    |
| GO:0002009 | morphogenesis of an epithelium                | 5.149e-15       | 27    |
| GO:0007498 | mesoderm development                          | 8.450e-15       | 19    |
| GO:0060429 | epithelium development                        | 1.484e-14       | 27    |
| GO:0007389 | pattern specification process                 | 8.555e-14       | 36    |
| GO:0045165 | cell fate commitment                          | 9.389e-14       | 26    |
| GO:0048598 | embryonic morphogenesis                       | 4.317e-13       | 25    |
| GO:0003002 | regionalization                               | 3.157e-12       | 33    |
| GO:0006928 | cell motion                                   | 6.954e-12       | 27    |
| GO:0035295 | tube development                              | 7.660e-12       | 17    |
| GO:0048332 | mesoderm morphogenesis                        | 1.030e-11       | 11    |
| GO:0007369 | gastrulation                                  | 1.227e-11       | 15    |
| GO:0035051 | cardiac cell differentiation                  | 1.397e-11       | 10    |
| GO:0001704 | formation of primary germ layer               | 3.511e-11       | 11    |
| GO:0001709 | cell fate determination                       | 4.816e-11       | 18    |
| GO:0016477 | cell migration                                | 1.021e-10       | 20    |
| GO:0035239 | tube morphogenesis                            | 1.095e-10       | 15    |
| GO:0007444 | imaginal disc development                     | 2.178e-10       | 29    |
| GO:0048565 | gut development                               | 2.212e-10       | 14    |
| GO:0001707 | mesoderm formation                            | 2.383e-10       | 10    |
| GO:0048732 | gland development                             | 2.494e-10       | 19    |
| GO:0048870 | cell motility                                 | 3.242e-10       | 20    |
| GO:0051674 | localization of cell                          | 7.282e-10       | 20    |
| GO:0048569 | post-embryonic organ development              | 9.052e-10       | 24    |
| GO:0007422 | peripheral nervous system development         | 2.474e-09       | 14    |
| GO:0009791 | post-embryonic development                    | 3.419e-09       | 28    |
| GO:0035107 | appendage morphogenesis                       | 4.187e-09       | 21    |
| GO:0048736 | appendage development                         | 5.563e-09       | 21    |
| GO:0007552 | metamorphosis                                 | 8.462e-09       | 25    |
| GO:0035272 | exocrine system development                   | 1.189e-08       | 16    |
| GO:0007431 | salivary gland development                    | 1.189e-08       | 16    |
| GO:0035114 | imaginal disc-derived appendage morphogenesis | 2.009e-08       | 20    |
| GO:0009886 | post-embryonic morphogenesis                  | 2.507e-08       | 24    |
| GO:0048737 | imaginal disc-derived appendage development   | 2.633e-08       | 20    |
| GO:0007442 | hindgut morphogenesis                         | 2.696e-08       | 10    |
| GO:0010002 | cardioblast differentiation                   | 3.524e-08       | 7     |
| GO:0048859 | formation of anatomical boundary              | 4.164e-08       | 10    |
| GO:0007424 | open tracheal system development              | 4.408e-08       | 16    |
| GO:0060541 | respiratory system development                | 4.408e-08       | 16    |
| GO:0035120 | post-embryonic appendage morphogenesis        | 5.846e-08       | 19    |
| GO:0048567 | ectodermal gut morphogenesis                  | 6.286e-08       | 10    |
| GO:0007439 | ectodermal gut development                    | 6.286e-08       | 10    |
| GO:0048563 | post-embryonic organ morphogenesis            | 6.362e-08       | 21    |
| GO:0007560 | imaginal disc morphogenesis                   | 6.362e-08       | 21    |
| GO:0007447 | imaginal disc pattern formation               | 7.205e-08       | 13    |
| GO:0007513 | pericardial cell differentiation              | 7.376e-08       | 6     |
| GO:0008586 | imaginal disc-derived wing vein morphogenesis | 7.542e-08       | 9     |
| GO:0048547 | gut morphogenesis                             | 7.663e-08       | 10    |

Supplementary Table 18: Top 50 GO FAT BP terms from the top 200 genes from the marginal model for DI conservation data.

| ID         | name                                                      | <i>p</i> -value | count |
|------------|-----------------------------------------------------------|-----------------|-------|
| GO:0006816 | calcium ion transport                                     | 3.096e-06       | 8     |
| GO:0045165 | cell fate commitment                                      | 1.396e-05       | 18    |
| GO:0015674 | di-, tri-valent inorganic cation transport                | 1.652e-05       | 8     |
| GO:0030182 | neuron differentiation                                    | 3.273e-05       | 24    |
| GO:0006812 | cation transport                                          | 4.062e-05       | 18    |
| GO:0016192 | vesicle-mediated transport                                | 4.887e-05       | 23    |
| GO:0007267 | cell-cell signaling                                       | 6.479e-05       | 16    |
| GO:0030001 | metal ion transport                                       | 7.104e-05       | 14    |
| GO:0006811 | ion transport                                             | 7.606e-05       | 21    |
| GO:0007010 | cytoskeleton organization                                 | 8.608e-05       | 25    |
| GO:0000902 | cell morphogenesis                                        | 1.083e-04       | 24    |
| GO:0009792 | embryonic development ending in birth or egg hatching ... | 1.274e-04       | 16    |
| GO:0060284 | regulation of cell development                            | 1.474e-04       | 12    |
| GO:0032989 | cellular component morphogenesis                          | 1.765e-04       | 26    |
| GO:0006897 | endocytosis                                               | 1.852e-04       | 17    |
| GO:0010324 | membrane invagination                                     | 1.852e-04       | 17    |
| GO:0046331 | lateral inhibition                                        | 3.514e-04       | 4     |
| GO:0008104 | protein localization                                      | 4.057e-04       | 21    |
| GO:0030030 | cell projection organization                              | 4.444e-04       | 20    |
| GO:0002009 | morphogenesis of an epithelium                            | 4.563e-04       | 15    |
| GO:0006886 | intracellular protein transport                           | 4.672e-04       | 13    |
| GO:0006350 | transcription                                             | 4.899e-04       | 23    |
| GO:0045168 | cell-cell signaling involved in cell fate ...             | 5.530e-04       | 4     |
| GO:0046907 | intracellular transport                                   | 5.553e-04       | 18    |
| GO:0001709 | cell fate determination                                   | 5.616e-04       | 11    |
| GO:0034613 | cellular protein localization                             | 6.060e-04       | 13    |
| GO:0051301 | cell division                                             | 6.098e-04       | 14    |
| GO:0048666 | neuron development                                        | 6.578e-04       | 19    |
| GO:0050767 | regulation of neurogenesis                                | 6.632e-04       | 8     |
| GO:0016044 | membrane organization                                     | 6.887e-04       | 18    |
| GO:0060429 | epithelium development                                    | 7.042e-04       | 15    |
| GO:0007423 | sensory organ development                                 | 7.185e-04       | 21    |
| GO:0007444 | imaginal disc development                                 | 7.636e-04       | 21    |
| GO:0048511 | rhythmic process                                          | 7.721e-04       | 7     |
| GO:0051960 | regulation of nervous system development                  | 8.218e-04       | 9     |
| GO:0007389 | pattern specification process                             | 8.933e-04       | 23    |
| GO:0001700 | embryonic development via the syncytial blastoderm        | 9.117e-04       | 14    |
| GO:0000904 | cell morphogenesis involved in differentiation            | 1.093e-03       | 17    |
| GO:0048813 | dendrite morphogenesis                                    | 1.119e-03       | 10    |
| GO:0016358 | dendrite development                                      | 1.119e-03       | 10    |
| GO:0048729 | tissue morphogenesis                                      | 1.144e-03       | 15    |
| GO:0030036 | actin cytoskeleton organization                           | 1.250e-03       | 11    |
| GO:0030029 | actin filament-based process                              | 1.318e-03       | 11    |
| GO:0007560 | imaginal disc morphogenesis                               | 1.559e-03       | 16    |
| GO:0048563 | post-embryonic organ morphogenesis                        | 1.559e-03       | 16    |
| GO:0048812 | neuron projection morphogenesis                           | 1.671e-03       | 16    |
| GO:0008356 | asymmetric cell division                                  | 1.699e-03       | 7     |
| GO:0031175 | neuron projection development                             | 1.730e-03       | 16    |
| GO:0048667 | cell morphogenesis involved in neuron ...                 | 1.790e-03       | 16    |
| GO:0046530 | photoreceptor cell differentiation                        | 2.098e-03       | 10    |

Supplementary Table 19: Top 50 GO FAT BP terms from genes with  $\text{fdr} \leq 0.2$  from the joint model for all DI data. 1650 genes are represented.

| ID         | name                                           | <i>p</i> -value | count |
|------------|------------------------------------------------|-----------------|-------|
| GO:0007389 | pattern specification process                  | 2.102e-37       | 172   |
| GO:0045165 | cell fate commitment                           | 3.888e-37       | 111   |
| GO:0003002 | regionalization                                | 2.788e-34       | 161   |
| GO:0001709 | cell fate determination                        | 3.456e-33       | 76    |
| GO:0048598 | embryonic morphogenesis                        | 3.611e-32       | 103   |
| GO:0048729 | tissue morphogenesis                           | 5.979e-29       | 104   |
| GO:0006928 | cell motion                                    | 1.405e-27       | 116   |
| GO:0007444 | imaginal disc development                      | 1.644e-27       | 140   |
| GO:0009791 | post-embryonic development                     | 1.459e-26       | 143   |
| GO:0060429 | epithelium development                         | 3.338e-26       | 97    |
| GO:0002009 | morphogenesis of an epithelium                 | 3.534e-25       | 93    |
| GO:0000902 | cell morphogenesis                             | 3.853e-25       | 142   |
| GO:0009880 | embryonic pattern specification                | 3.441e-24       | 93    |
| GO:0032989 | cellular component morphogenesis               | 2.213e-23       | 154   |
| GO:0045449 | regulation of transcription                    | 3.547e-23       | 207   |
| GO:0002165 | instar larval or pupal development             | 4.276e-23       | 133   |
| GO:0007350 | blastoderm segmentation                        | 5.393e-23       | 88    |
| GO:0048569 | post-embryonic organ development               | 1.146e-22       | 106   |
| GO:0030182 | neuron differentiation                         | 5.083e-22       | 129   |
| GO:0000904 | cell morphogenesis involved in differentiation | 6.711e-22       | 106   |
| GO:0035282 | segmentation                                   | 3.691e-21       | 95    |
| GO:0048667 | cell morphogenesis involved in neuron ...      | 5.751e-21       | 101   |
| GO:0009886 | post-embryonic morphogenesis                   | 6.941e-21       | 115   |
| GO:0051252 | regulation of RNA metabolic process            | 7.203e-21       | 179   |
| GO:0048812 | neuron projection morphogenesis                | 1.178e-20       | 100   |
| GO:0031175 | neuron projection development                  | 1.570e-20       | 100   |
| GO:0007552 | metamorphosis                                  | 2.024e-20       | 116   |
| GO:0016477 | cell migration                                 | 4.190e-20       | 73    |
| GO:0048707 | instar larval or pupal morphogenesis           | 5.393e-20       | 112   |
| GO:0048666 | neuron development                             | 5.393e-20       | 112   |
| GO:0051674 | localization of cell                           | 5.537e-20       | 78    |
| GO:0007560 | imaginal disc morphogenesis                    | 8.649e-20       | 98    |
| GO:0048563 | post-embryonic organ morphogenesis             | 8.649e-20       | 98    |
| GO:0048870 | cell motility                                  | 1.836e-19       | 75    |
| GO:0030030 | cell projection organization                   | 4.162e-19       | 114   |
| GO:0006355 | regulation of transcription, DNA-dependent     | 1.436e-18       | 161   |
| GO:0016331 | morphogenesis of embryonic epithelium          | 3.448e-18       | 56    |
| GO:0048732 | gland development                              | 1.932e-17       | 66    |
| GO:0048858 | cell projection morphogenesis                  | 2.554e-17       | 101   |
| GO:0007369 | gastrulation                                   | 2.813e-17       | 41    |
| GO:0048565 | gut development                                | 5.405e-17       | 41    |
| GO:0048610 | reproductive cellular process                  | 5.568e-17       | 136   |
| GO:0035220 | wing disc development                          | 6.118e-17       | 92    |
| GO:0032990 | cell part morphogenesis                        | 1.072e-16       | 102   |
| GO:0048736 | appendage development                          | 1.601e-15       | 82    |
| GO:0007409 | axonogenesis                                   | 2.497e-15       | 71    |
| GO:0007423 | sensory organ development                      | 3.029e-15       | 115   |
| GO:0060541 | respiratory system development                 | 4.730e-15       | 60    |
| GO:0007424 | open tracheal system development               | 4.730e-15       | 60    |
| GO:0007391 | dorsal closure                                 | 6.065e-15       | 45    |

Supplementary Table 20: KEGG pathways from selected genes from DI gene lists.

(a) From top 200 genes from the joint model for all DI data.

| ID       | name                         | <i>p</i> -value | count |
|----------|------------------------------|-----------------|-------|
| dme04340 | Hedgehog signaling pathway   | 5.569e-03       | 4     |
| dme00010 | Glycolysis / Gluconeogenesis | 7.777e-03       | 5     |
| dme04144 | Endocytosis                  | 3.348e-02       | 5     |

(b) From top 200 genes from the marginal model for DI binding data.

| ID       | name                         | <i>p</i> -value | count |
|----------|------------------------------|-----------------|-------|
| dme00020 | Citrate cycle (TCA cycle)    | 4.005e-02       | 4     |
| dme00620 | Pyruvate metabolism          | 4.731e-02       | 4     |
| dme00010 | Glycolysis / Gluconeogenesis | 6.077e-02       | 4     |

(c) From top 200 genes from the marginal model for DI expression data.

| ID       | name                       | <i>p</i> -value | count |
|----------|----------------------------|-----------------|-------|
| dme04340 | Hedgehog signaling pathway | 6.079e-03       | 4     |
| dme04310 | Wnt signaling pathway      | 2.880e-02       | 5     |

(d) From top 200 genes from the marginal model for DI conservation data.

| ID       | name                    | <i>p</i> -value | count |
|----------|-------------------------|-----------------|-------|
| dme04310 | Wnt signaling pathway   | 1.504e-02       | 7     |
| dme04330 | Notch signaling pathway | 2.146e-02       | 4     |
| dme04144 | Endocytosis             | 6.803e-02       | 6     |
| dme03010 | Ribosome                | 9.390e-02       | 6     |

(e) From genes with  $fdr \leq 0.2$  from the joint model for all DI data.

| ID       | name                         | <i>p</i> -value | count |
|----------|------------------------------|-----------------|-------|
| dme04340 | Hedgehog signaling pathway   | 1.646e-03       | 11    |
| dme04320 | Dorso-ventral axis formation | 3.346e-03       | 11    |
| dme00010 | Glycolysis / Gluconeogenesis | 3.397e-03       | 17    |
| dme00620 | Pyruvate metabolism          | 2.043e-02       | 14    |
| dme03040 | Spliceosome                  | 4.397e-02       | 25    |
| dme00071 | Fatty acid metabolism        | 4.619e-02       | 11    |

(f) From genes identified as Dorsal targets by Biemar et al. (2006). 42 genes are represented.

| ID       | name                       | <i>p</i> -value | count |
|----------|----------------------------|-----------------|-------|
| dme04340 | Hedgehog signaling pathway | 6.817e-02       | 2     |

(g) From genes identified as Dorsal targets by Zeitlinger et al. (2007). 38 genes are represented.

| ID       | name                       | <i>p</i> -value | count |
|----------|----------------------------|-----------------|-------|
| dme04340 | Hedgehog signaling pathway | 3.466e-02       | 2     |
| dme04350 | TGF-beta signaling pathway | 4.887e-02       | 2     |

## References

- L.E. Baum, T. Petrie, G. Soules, and N. Weiss. A maximization technique occurring in the statistical analysis of probabilistic functions of Markov chains. *The Annals of Mathematical Statistics*, 41(1):164–171, 1970.
- F. Biemar, D.A. Nix, J. Piel, B. Peterson, M. Ronshaugen, V. Sementchenko, I. Bell, J.R. Manak, and M.S. Levine. Comprehensive identification of *Drosophila* dorsal-ventral patterning genes using a whole-genome tiling array. *Proceedings of the National Academy of Sciences*, 103(34):12763–12768, 2006. doi: 10.1073/pnas.0604484103.
- D.W. Huang, B.T. Sherman, and R.A. Lempicki. Systematic and integrative analysis of large gene lists using DAVID bioinformatics resources. *Nature Protocols*, 4(1):44–57, 2009a.
- D.W. Huang, B.T. Sherman, and R.A. Lempicki. Bioinformatics enrichment tools: paths toward the comprehensive functional analysis of large gene lists. *Nucleic Acids Research*, 37(1):1–13, 2009b.
- M. Kanehisa and S. Goto. KEGG: Kyoto Encyclopedia of Genes and Genomes. *Nucleic Acids Research*, 28:27–30, 2000.
- M. Kanehisa, S. Goto, Y. Sato, M. Furumichi, and M. Tanabe. KEGG for integration and interpretation of large-scale molecular datasets. *Nucleic Acids Research*, 40:D109–D114, 2012.
- G.J. McLachlan and T. Krishnan. *The EM Algorithm and Extensions*. Wiley, second edition, 2008.
- K.M. Mullen and I.H.M. van Stokkum. *nnls: The Lawson-Hanson algorithm for non-negative least squares (NNLS)*, 2012. R package version 1.4.
- J. Zeitlinger, R.P. Zinzen, A. Stark, M. Kellis, H. Zhang, R.A. Young, and M. Levine. Whole-genome ChIP-chip analysis of Dorsal, Twist, and Snail suggests integration of diverse patterning processes in the *Drosophila* embryo. *Genes & Development*, 21(4):385–390, 2007. doi: 10.1101/gad.1509607.
